# Supplementary material
Source: PubMed Central journal article supplement (PMC7964648)
Supplement: 3055_tables.pdf [file 3055_tables.pdf]

**On-line Table 1: Degenerative pattern**

| Disease                                           | Posterior Fossa MRI Finding             | Additional MRI Findings                                      | Confirmatory Test                                                                    |
|---------------------------------------------------|-----------------------------------------|--------------------------------------------------------------|--------------------------------------------------------------------------------------|
| Friedrich ataxia                                  | Normal, mild cord atrophy               | CA (mild), T2 cord SC, iron deposition at DN                 | Genetic testing                                                                      |
| AOA                                               | CA (<vermis)                            | Reduced NAA and elevated mlns on MRS                         | Clinical and lab findings (albumin, cholesterol, $\alpha$ -fetoprotein) <sup>g</sup> |
| Ataxia-telangiectasia                             | CA (<vermis)                            | WM and BG lesions, spinal cord atrophy                       | Clinical, lab findings ( $\alpha$ -fetoprotein), and molecular genetic testing       |
| Infantile-onset spinocerebellar ataxia            | CA                                      | Brain stem and cord atrophy, cerebellum SC                   | Clinical and genetic testing                                                         |
| X-linked congenital ataxia <sup>a</sup>           | CA                                      | Variable                                                     | Genetic testing                                                                      |
| Mitochondrial disorders <sup>b</sup>              | CA                                      | WM, BG, and cortex SC; restricted DWI; lactate on MRS        | Clinical, neuroimaging, and genetic testing                                          |
| Ataxia with vitamin E deficiency                  | Normal or mild CA                       | Posterior and lateral columns of the cord SC                 | Clinical, lab findings (vitamin E, lipoprotein, and acanthocytosis) <sup>h</sup>     |
| Dentatorubral-pallidoluysian atrophy              | CA and midbrain atrophy                 | Cerebral WM and brain stem SC, brain atrophy                 | Genetic testing                                                                      |
| Cerebrotendinous xanthomatosis                    | CA and SC in the DN                     | WM, CST, BG, and brain stem SC; brain atrophy                | Clinical and lab findings (cholestanol in serum and tendons)                         |
| Episodic ataxia (types I to VII)                  | CA (<vermis)                            | None                                                         | Clinical, neuroimaging, and genetic analysis                                         |
| Infantile refsum disease                          | SC in the dentate nucleus               | Brain atrophy; WM, CC, CST, and brain stem SC                | Clinical and lab findings (phytanic and pristanic acid)                              |
| Infantile neuroaxonal dystrophy                   | SC and atrophy in the cerebellar cortex | Brain, WM, and optic nerve atrophy; Low T2 signal at GP      | Clinical, neuroimaging, and genetic testing                                          |
| Adrenomyeloneuropathy                             | SC in the cerebellar WM and CST         | Brain involvement is less common than classic ADL            | Clinical and lab findings (very long-chain fatty acids)                              |
| Aminoacidurias and organic acidurias <sup>c</sup> | CA in some subtypes                     | Variable                                                     | Clinical, neuroimaging, and genetic testing                                          |
| HABC                                              | CA (<vermis)                            | Diffuse hypomyelination; BG, CST, and WM atrophy and SC      | Clinical and neuroimaging                                                            |
| Gangliosidosis GM2 <sup>d</sup>                   | CA (>vermis)                            | Reduced NAA at MRS in cerebellum and WM                      | Clinical and lab findings ( $\beta$ -hexosaminidase)                                 |
| Neuronal ceroid lipofuscinoses <sup>e</sup>       | CA                                      | Brain atrophy, low T2 signal in the thalamus, lactate on MRS | Clinical, genetic, and lab testing (lipopigments from the skin)                      |
| AR ataxia of Charlevoix-Saguenay                  | CA (<superior vermis), T2 pons SC       | Small CST and large pontocerebellar fibers at DTI            | Clinical and genetic testing                                                         |
| Marinesco-Sjögren syndrome                        | CA (or hypoplasia)                      | Agensis CC, small pituitary gland, cortex SC                 | Clinical and genetic testing                                                         |
| 4H syndrome                                       | CA and WM lesions                       | Cerebral hypomyelination, thin CC                            | Clinical findings                                                                    |
| Alexander disease <sup>e</sup>                    | SC brain stem with enhancement          | Frontal subcortical WM and BG SC                             | Clinical, lab findings (glial fibrillary acidic protein 5), and genetic testing      |
| HCC                                               | SC cerebellar WM, pons hypoplastic      | Diffuse WM hypomyelination at the periventricular WM         | Genetic testing                                                                      |
| PPCARP                                            | SC dorsal cord                          | None                                                         | Clinical, neuroimaging, and genetic testing                                          |
| Wilson disease <sup>f</sup>                       | SC dorsal midbrain, CP and SCP          | Signs of hepatic failure; BG, thalamus, and WM SC            | Clinical, neuroimaging, and lab testing (copper/ceruloplasmin)                       |

**Note:**—AOA indicates ataxia with oculomotor apraxia (types 1 and 2); ADL, adrenoleukodystrophy; CA, cerebellar atrophy; CC, corpus callosum; CP, cerebral peduncle; CST, corticospinal tract; DN, dentate nucleus; GP, globus pallidus; mlns, myo-inositol; HABC, hypomyelination with atrophy of the basal ganglia and cerebellum; GM2 = ganglioside 2; HCC, hypomyelination with congenital cataracts; SCP, superior cerebellar peduncle; PPCARP, posterior column ataxia and retinitis pigmentosa; SC, T2 high signal changes; BG, basal ganglia.

<sup>a</sup> Including X-linked sideroblastic anemia and ataxia.

<sup>b</sup> Including *coenzyme q10* and *POLG* mutations.

<sup>c</sup> Ataxia can occur in some diseases, including urea cycle disorders and mevalonic aciduria.

<sup>d</sup> Late-onset.

<sup>e</sup> Infantile-onset.

<sup>f</sup> Ataxic-onset in children.

<sup>g</sup> Reduced albumin, elevated cholesterol and  $\alpha$ -fetoprotein in the plasma.

<sup>h</sup> Acanthocytosis in abetalipoproteinemia.

| <b>On-line Table 2: Malformative pattern</b>               |                                                            |                                                                                                                                            |                                                  |
|------------------------------------------------------------|------------------------------------------------------------|--------------------------------------------------------------------------------------------------------------------------------------------|--------------------------------------------------|
| <b>Disease</b>                                             | <b>Posterior Fossa MRI Finding</b>                         | <b>Additional Imaging Findings</b>                                                                                                         | <b>Confirmatory Test</b>                         |
| Joubert syndrome and related diseases                      | Molar tooth malformation                                   | Abnormal foliation and fissuration of CH, CC dysgenesis, migration disorders, ventriculomegaly                                             | Clinical and neuroimaging                        |
| PCH <sup>a</sup>                                           | PC hypoplasia, “dragon-fly” configuration (>PCH I or II)   | Microcephaly, abnormal CC, polymicrogyria                                                                                                  | Clinical, neuroimaging, and genetic testing      |
| Rhombencephalossinapsis                                    | Agenesis of the CV, fusion of the CH and DN                | CC dysgenesis, ventriculomegaly                                                                                                            | Clinical and neuroimaging                        |
| Congenital disorders of glycosylation                      | PC hypoplasia with atrophy superimposed (>CV)              | Brain stem hypoplasia, WM hypoplasia or atrophy                                                                                            | Clinical, neuroimaging, lab, and genetic testing |
| X-linked nonprogressive congenital ataxia <sup>b</sup>     | PC hypoplasia with atrophy superimposed                    | Not described                                                                                                                              | Clinical, neuroimaging, and genetic testing      |
| Vermian and hemispheric cerebellar dysplasia               | Abnormal folia orientation and cortical dysplasia          | Variable according to the genetic mutation (cerebral malformation, brain atrophy, and ventriculomegaly can occur)                          | Neuroimaging                                     |
| VLDLR-associated cerebellar hypoplasia <sup>c</sup>        | Vermis and CH hypoplasia (>inferior portion of the vermis) | Mild cortical gyral simplification                                                                                                         | Clinical, neuroimaging, and genetic testing      |
| Dandy-Walker malformation                                  | Enlarged PF, agenesis vermis, and elevated torcula         | Hydrocephalus, CC anomalies, PMG, heterotopia, cephalocele                                                                                 | Neuroimaging                                     |
| Pontine tegmental cap dysplasia                            | Cap tegmental appearance                                   | Dysgenesis of the corpus callosum, small inner auditory canal and/or VII/VIII nerves, abnormal tegmentum transverse fibers (DTI)           | Neuroimaging                                     |
| Cortex malformation disorders <sup>d</sup>                 | Cerebellar hypoplasia                                      | Cerebellar cyst, brain stem hypoplasia, and WM lesions; cobblestone lissencephaly and hydrocephalus, usually with more severe types of CMD | Clinical, neuroimaging, and genetic testing      |
| Brain stem malformation with abnormal segmentation pattern | Short pons, short midbrain/long pons or thick medulla      | Variable and includes narrow isthmus, brain stem clefts, large CH, absent CC, ventriculomegaly                                             | Clinical and neuroimaging.                       |
| Unertan syndrome                                           | Cerebellar hypoplasia (>vermis)                            | Not described                                                                                                                              | Clinical and neuroimaging.                       |
| Höyeraal-Hreidarsson syndrome                              | Cerebellar hypoplasia                                      | Small pons, thin CC, hypomyelination, bone lesion                                                                                          | Clinical, neuroimaging, and genetic testing      |
| Revesz syndrome                                            | Cerebellar hypoplasia                                      | Multiple cerebral calcifications, leukodystrophy                                                                                           | Clinical, neuroimaging, and genetic testing      |

**Note:**—PCH indicates pontocerebellar hypoplasia; PF, posterior fossa; CMD, congenital muscular dystrophy; CC, corpus callosum; CH, cerebellar hemispheres; CV, cerebellar vermis; DN, dentate nucleus; PC, pontocerebellar; PMG, polymicrogyria; VLDLR, very low density lipoprotein receptor.

<sup>a</sup> Types I-VII.

<sup>b</sup> Including isolated and X-linked subtypes.

<sup>c</sup> Dysequilibrium syndrome.

<sup>d</sup> Four most common CMD groups (mild phenotype).
